# Supplementary material
Source: Springer Nature journal article supplement (https://www.springermedizin.de/resource/supplementary/13643_2014_343_MOESM1_ESM.pdf/9681954)
Supplement: MOESM1 [file 9681954]

**Additional file 1: Screening criteria checklist.**

| Item                                                                                                                                                   | Yes | No | Can't say |
|--------------------------------------------------------------------------------------------------------------------------------------------------------|-----|----|-----------|
| 1. Publication date 1995-Dec 2011                                                                                                                      |     |    |           |
| 2. English or French language                                                                                                                          |     |    |           |
| 3. The paper discusses women living in Canada                                                                                                          |     |    |           |
| 4. The paper discusses immigrant women or newcomers                                                                                                    |     |    |           |
| 5. Is related to pregnancy and/or the perinatal/postnatal period?                                                                                      |     |    |           |
| 6. Is related to experiences and/or perceptions of maternity care/perinatal care?                                                                      |     |    |           |
| 7. Discusses access and navigation of maternity care/perinatal care and/or pregnancy, perinatal or postnatal outcomes of immigrant and newcomer women? |     |    |           |

The first five items and one of the last two must be met for retention. Literature with 'can't say' checks are being placed in the 'maybe' folder for full retrieval and further screening
